# Supplementary material for: The σ1 Receptor and the HINT1 Protein Control α2δ1 Binding to Glutamate NMDA Receptors: Implications in Neuropathic Pain
Source: MDPI journal article supplement (doi:10.3390/biom11111681), 2021-11-12
Supplement: s1 [file s1]

# Supplemental Figures

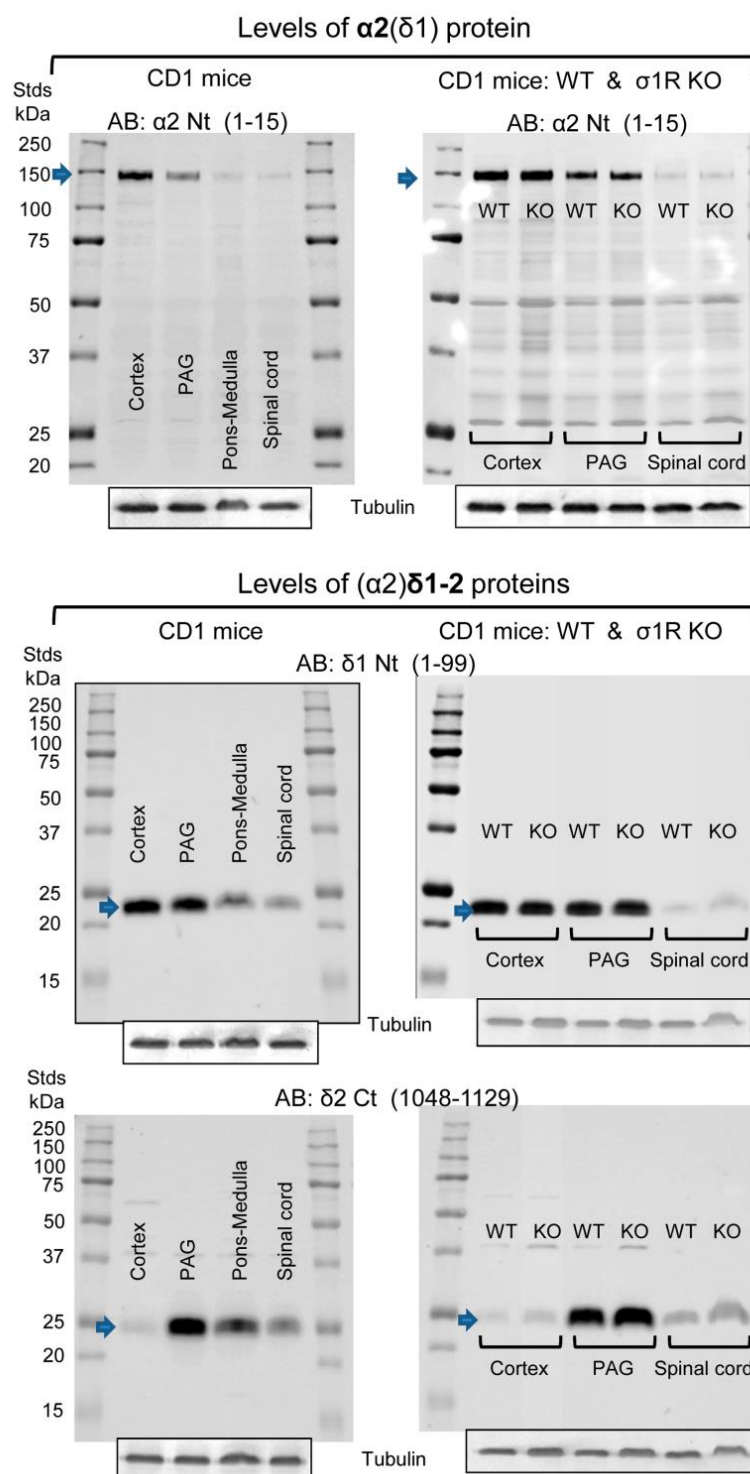

**Figure S1.** Expression of  $\alpha 2(\delta 1)$ ,  $(\alpha 2)\delta 1$  and  $(\alpha 2)\delta 2$  in the cerebral cortex, PAG, pons-medulla and spinal cord of CD1 wild type and CD1  $\sigma 1R^{-/-}$  mice. Mouse neural structures were collected and P2 fractions enriched in synaptosomes were obtained, resolving 60  $\mu$ g protein/lane by SDS-PAGE and analyzing this extract in Western blots that were probed with antibodies against  $\alpha 2\delta 1-2$  proteins (see Methods, representative Western blots are shown).

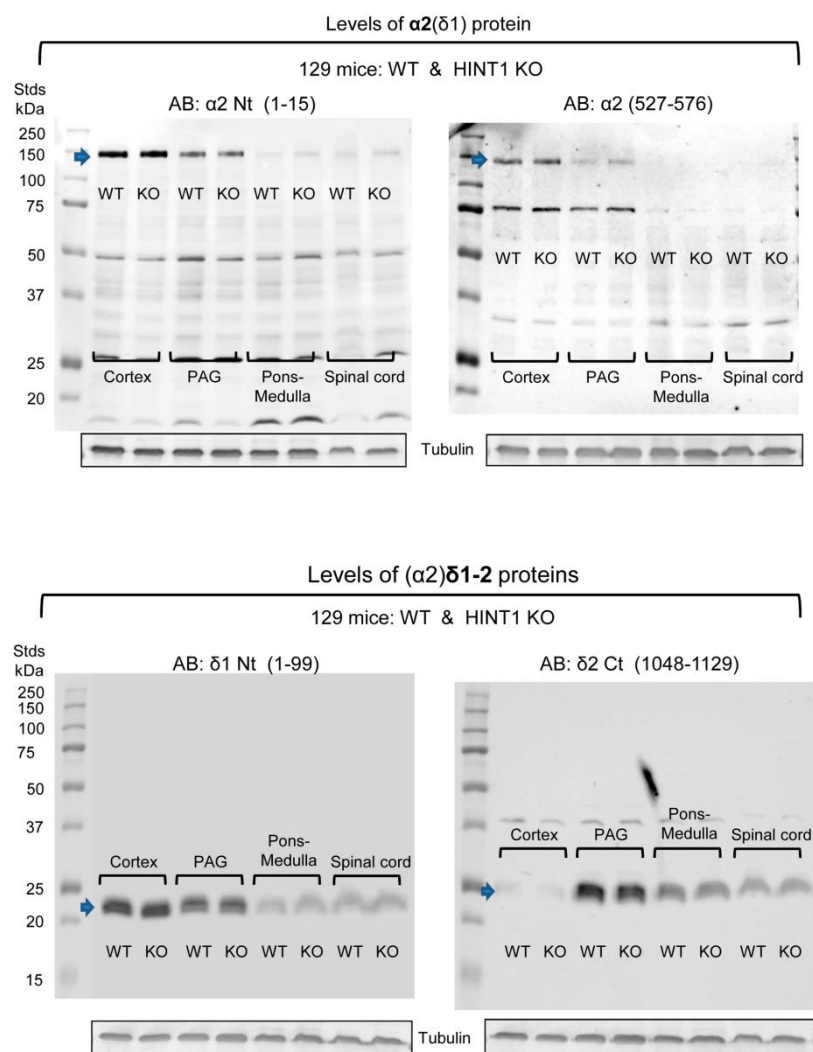

**Figure S2.** Expression of  $\alpha 2(\delta 1)$ ,  $(\alpha 2)\delta 1$  and  $(\alpha 2)\delta 2$  in the cerebral cortex, PAG, pons-medulla and spinal cord of 129 HINT1<sup>+/+</sup> and 129 HINT1<sup>-/-</sup> mice (for details see Figure S1, representative Western blots are shown).

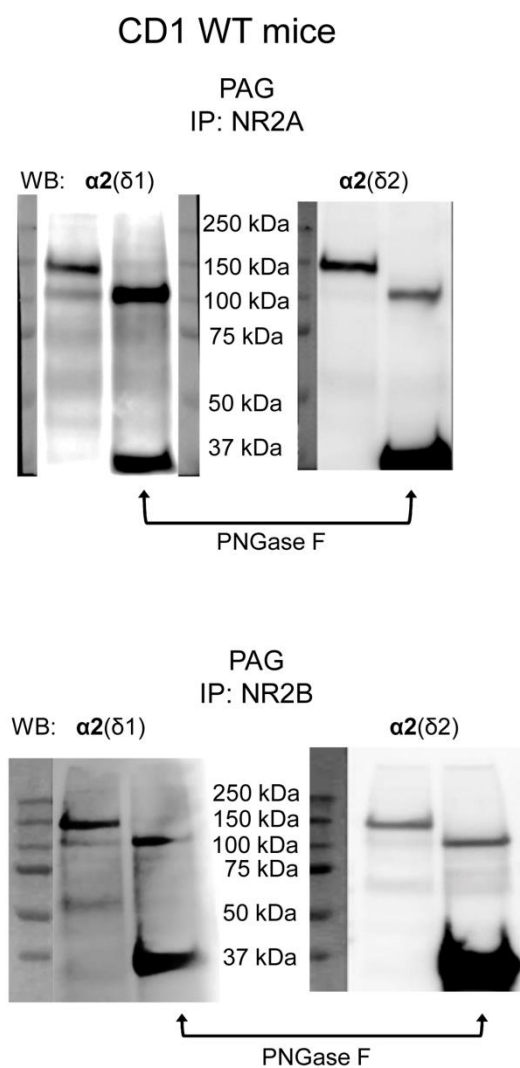

**Figure S3.** Representative Western blots of the assay presented in the Figure 2 main text.

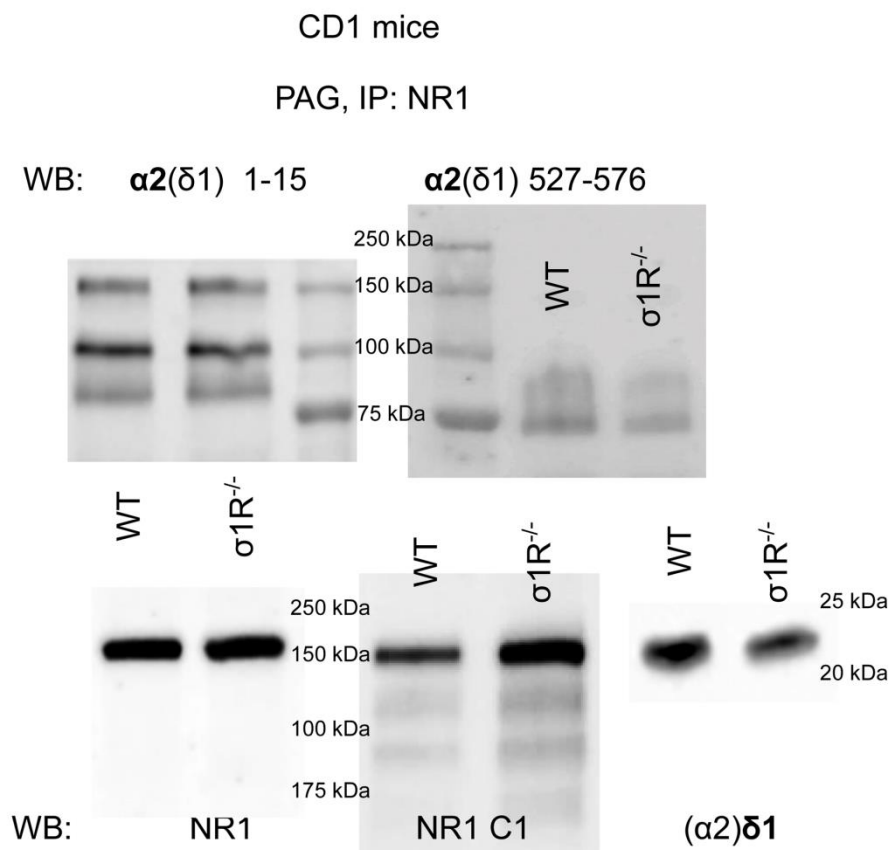

**Figure S4.** Representative Western blots of the assay presented in the Figure 4 main text.

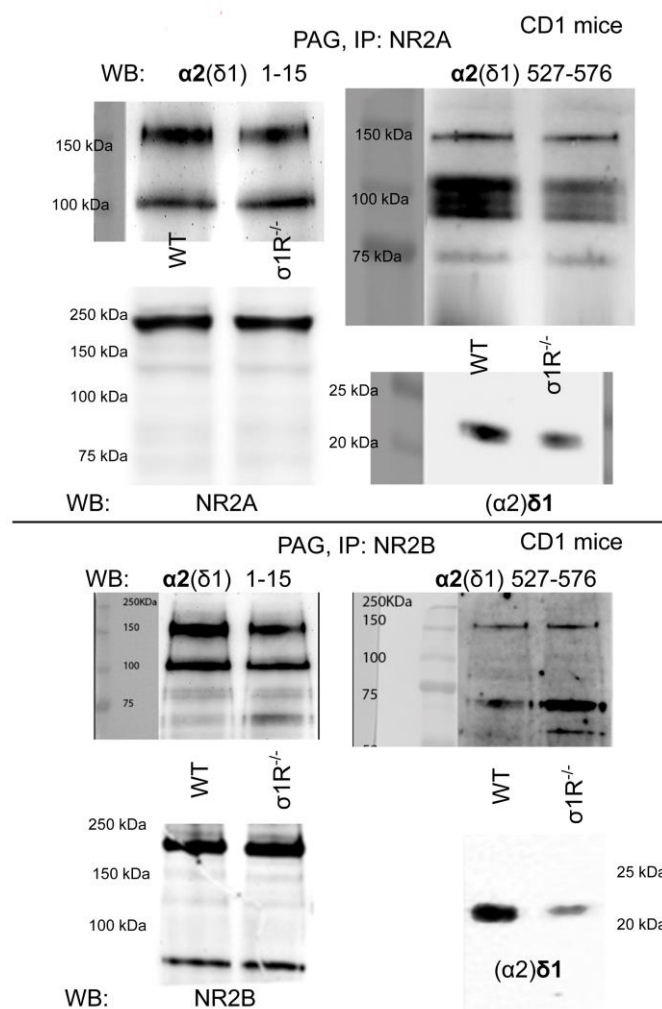

**Figure S5.** Representative Western blots of the assay presented in the Figure 4 main text.

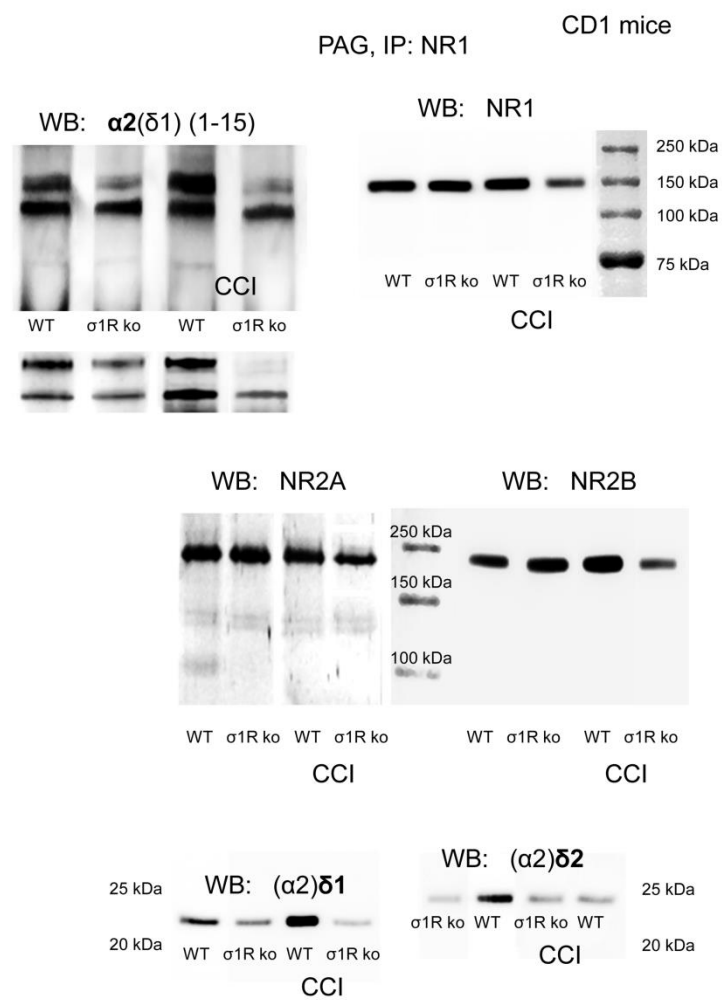

**Figure S6.** Representative Western blots of the assay presented in the Figure 5 main text.

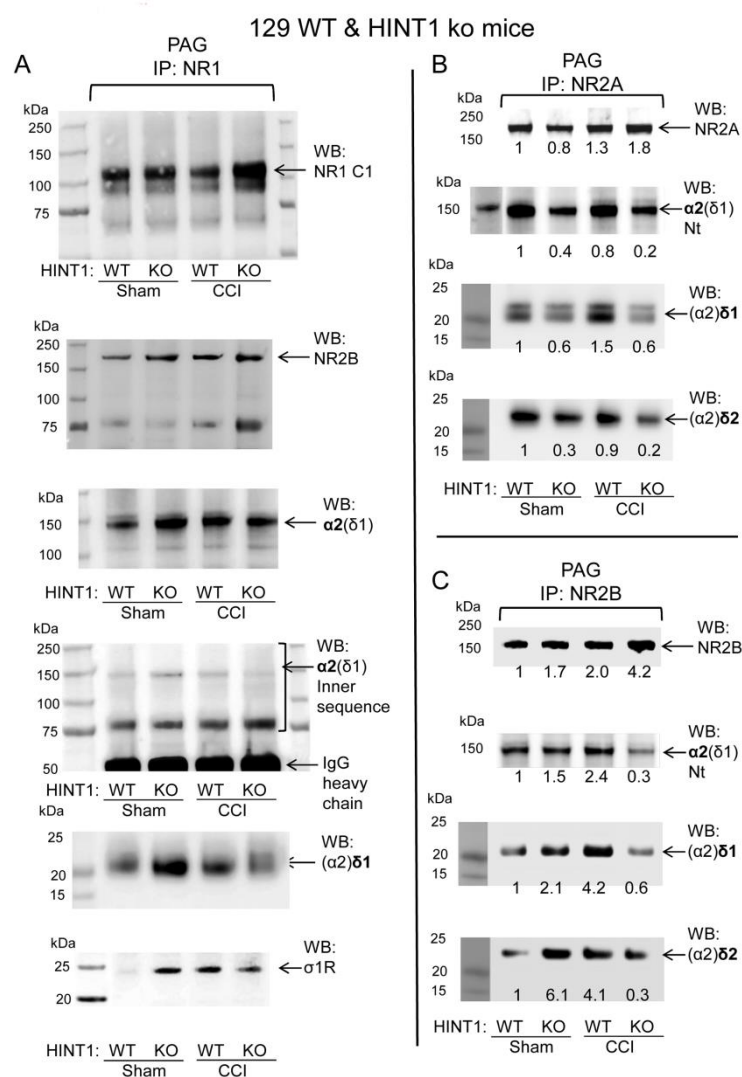

**Figure S7.** Effect of HINT1 on the molecular associations between the  $\alpha 2\delta 1$ -2 and NR1, NR2A or NR2B subunits in the CCI model of neuropathic pain. 129 WT and 129 HINT1<sup>-/-</sup> (KO) mice were sacrificed, and PAG synaptosomal fractions were obtained 7 days after surgery. Following membrane solubilization, (A) NR1, (B) NR2A and (C) NR2B subunits were immunoprecipitated (IP), and the co-precipitated proteins were resolved by SDS-PAGE and then analyzed in Western blots (WB). Representative Western blots are shown (for details see Figure 6).

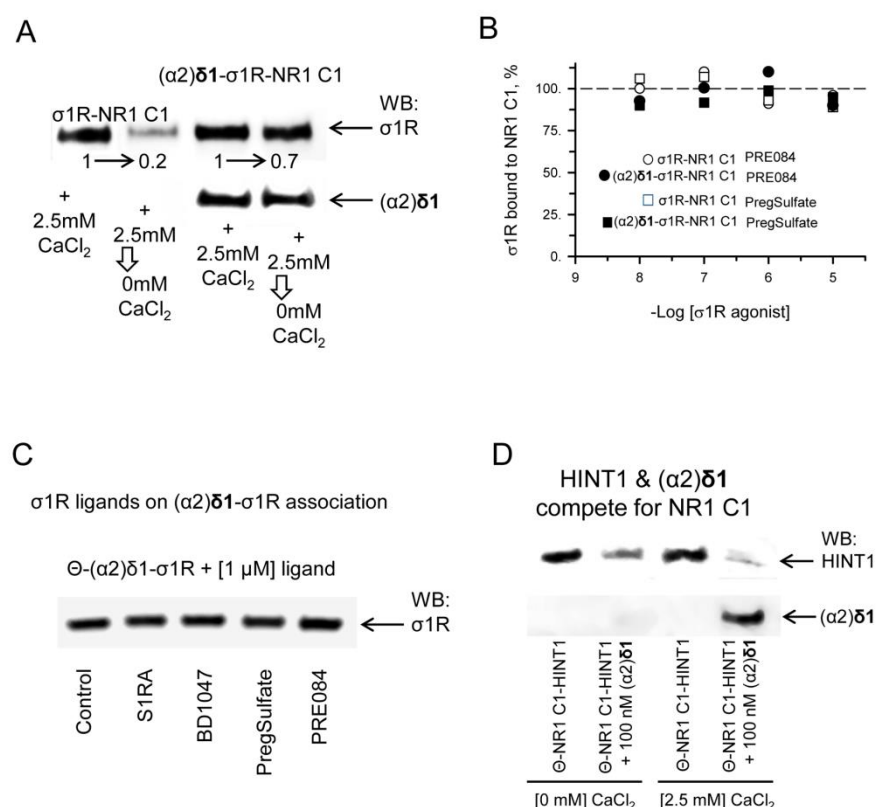

**Figure S8.** (A) The NR1 C1- $\sigma 1R$ -( $\alpha 2$ ) $\delta 1$  trimer exhibits more stability than the NR1 C1- $\sigma 1R$  dimer at low calcium concentrations. Dimers and trimers were formed in the presence of  $CaCl_2$  (2.5 mM) and after removing the calcium by three washes the presence of NR1 C1-bound  $\sigma 1R$ s and ( $\alpha 2$ ) $\delta 1$  proteins was determined in Western blots. (B) The influence of increasing concentrations of  $\sigma 1R$  agonists, PRE084 and Pregnenolone sulfate, on the NR1 C1- $\sigma 1R$  dimers and NR1 C1- $\sigma 1R$ -( $\alpha 2$ ) $\delta 1$  trimers was assessed. (C) Agonists and antagonists of  $\sigma 1R$ s do not alter the association of  $\sigma 1R$ s with ( $\alpha 2$ ) $\delta 1$  peptides. (D) When bound to NR1 C1 subunits, HINT1 proteins can interchange with ( $\alpha 2$ ) $\delta 1$  peptides. In the presence or absence of calcium, ( $\alpha 2$ ) $\delta 1$  reduces HINT1 binding to NR1 C1 subunits, but in the presence of  $CaCl_2$  (2.5 mM), ( $\alpha 2$ ) $\delta 1$  remains bound to the NR1 C1 subunit (for details see Figures 7A and 9A).



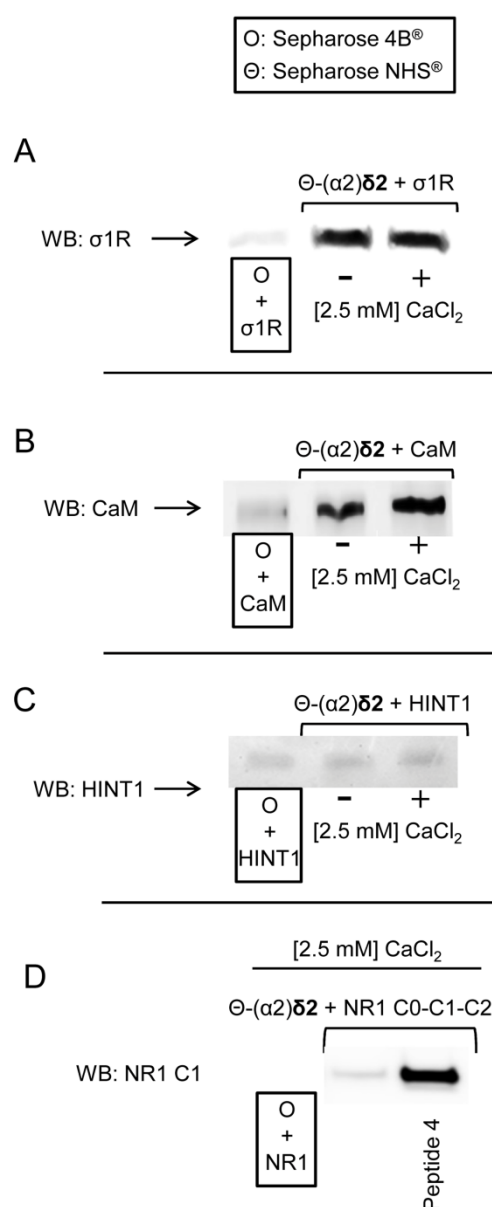

**Figure S9.** The effect of calcium on the physical interactions of ( $\alpha$ 2) $\delta$ 2 peptides with  $\sigma$ 1Rs, HINT1 proteins and calmodulin CaM. **A**, The ( $\alpha$ 2) $\delta$ 2 peptide binds to  $\sigma$ 1Rs in the absence of calcium. **B**, The ( $\alpha$ 2) $\delta$ 2 peptide binds to CaM in the absence of calcium. **C**, Calcium does not promote HINT1 protein binding to the ( $\alpha$ 2) $\delta$ 2 peptide. **D**, The ( $\alpha$ 2) $\delta$ 2 peptide binds to NR1 C1 NMDAR subunits in presence of peptide 4. O and Θ represents plain agarose and NHS-Sepharose®, respectively. For details see Figure 7A.

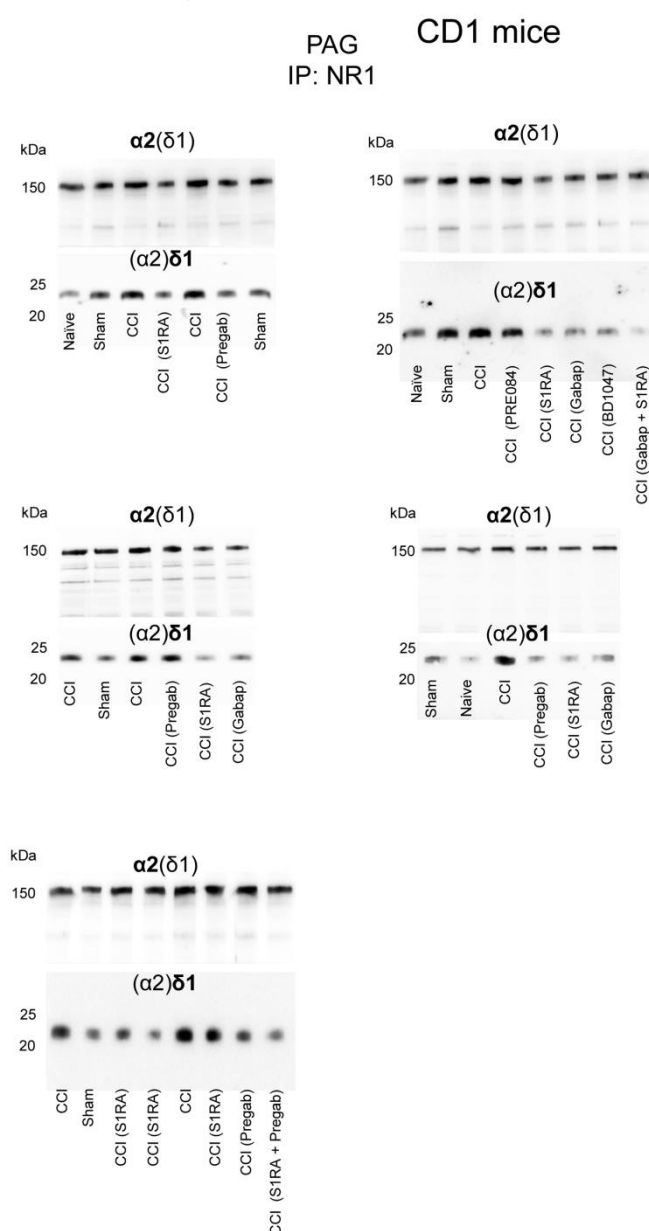

**Figure S10.** CCI model of neuropathic pain: the effect of S1RA, BD1047 and gabapentinoids on the molecular associations between the  $\alpha 2\delta 1$  proteins and NR1 C1 subunits in PAG synaptosomes. S1RA, Pregabalin, Gabapentin or BD1047 (all 3 nmol) were injected icv into CCI CD1 WT mice 7 days after surgery and after 30 min, the animals were sacrificed and PAG synaptosomal fractions were obtained. The NR1 subunits were immunoprecipitated from the solubilized membrane preparations and the co-precipitated  $\alpha 2\delta 1$  proteins were analyzed in Western blots (for further details see Methods and Figure 2). Gabap (Gabapentin); Pregab (Pregabalin).

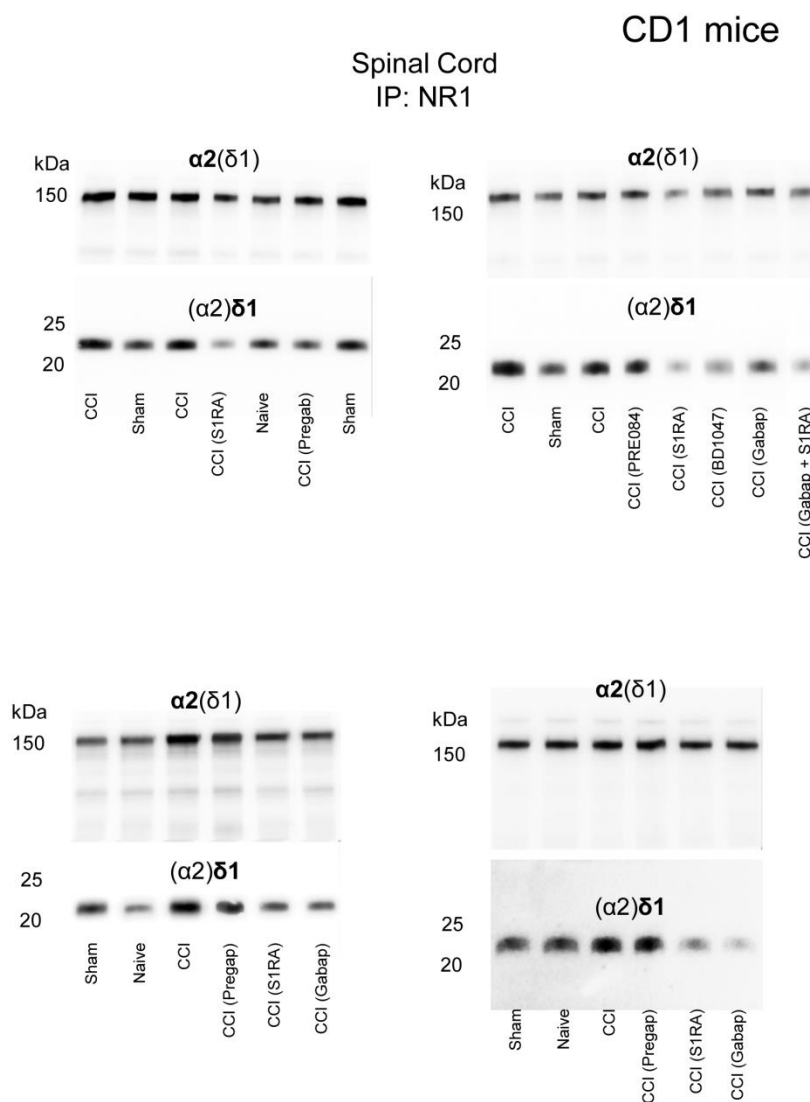

**Figure S11.** CCI model of neuropathic pain: the effect of S1RA, BD1047 and gabapentinoids on the  $\alpha 2\delta 1$ -NR1 association in spinal cord synaptosomal fraction (for details see Figure S10).
